# Supplementary material for: A universal solvent effect on the formation of soluble humins in glucose dehydration to 5-hydroxymethylfurfural
Source: Royal Society of Chemistry journal article supplement (doi:10.1039/d4re00018h), 2024-01-01
Supplement: d4re00018h1.pdf [file d4re00018h1.pdf]

## **-Supporting Information-**

### **A universal solvent effect on the formation of soluble humins in glucose dehydration to 5-hydroxymethylfurfural**

*Hui Li<sup>†</sup>, Hanyun Min<sup>‡</sup>, Yexin Hu<sup>†</sup>, Ping Hu<sup>†</sup>, Linzhen Li<sup>†</sup>, Huaqing Yang<sup>‡</sup>, Changwei Hu<sup>†</sup>, Liangfang  
Zhu<sup>\*,†</sup>*

<sup>†</sup>Key Laboratory of Green Chemistry and Technology, Ministry of Education, College of Chemistry,  
Sichuan University, Chengdu, Sichuan 610064, P. R. China.

<sup>‡</sup>College of Chemical Engineering, Sichuan University, Chengdu, Sichuan 610065, P. R. China.

Corresponding author:

Liangfang Zhu\*: [zhulf@scu.edu.cn](mailto:zhulf@scu.edu.cn)

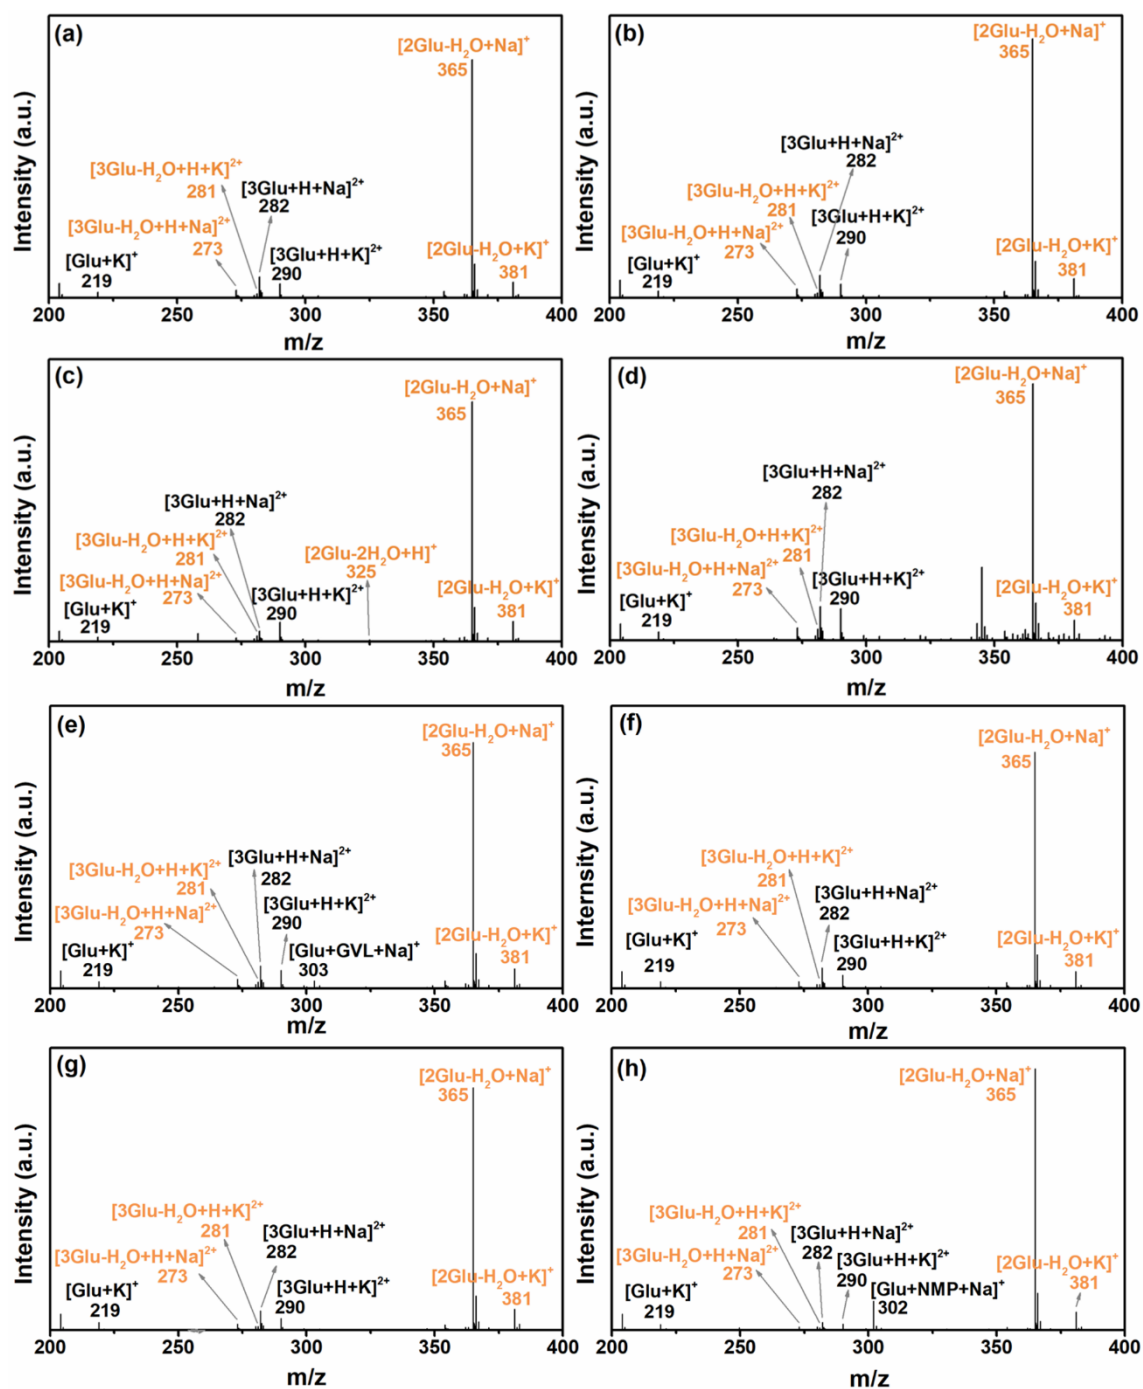

**Figure S1.** ESI-MS spectra of glucose (4.5 wt.%) in various solvents at room temperature. (a) H<sub>2</sub>O, (b) MIBK-H<sub>2</sub>O, (c) MTHF-H<sub>2</sub>O, (d) DMF-H<sub>2</sub>O, (e) GVL-H<sub>2</sub>O, (f) THF-H<sub>2</sub>O, (g) DIO-H<sub>2</sub>O, and (h) NMP-H<sub>2</sub>O.

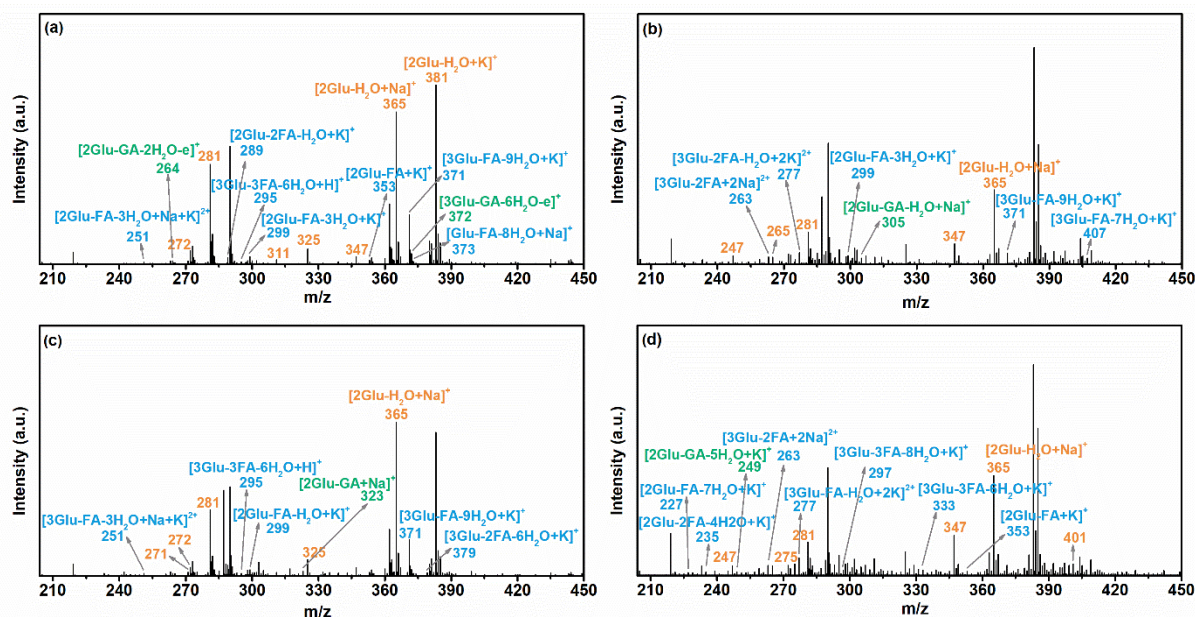

**Figure S2.** ESI-MS spectra of reaction mixture after reacting glucose at 120 °C for 4 h in presence of various acid catalysts. (a) H<sub>2</sub>O with 0.075 mM HCl, (b) H<sub>2</sub>O with 0.075 mM AlCl<sub>3</sub>·6H<sub>2</sub>O, (c) MTHF-H<sub>2</sub>O with 0.075 mM HCl and (d) MTHF-H<sub>2</sub>O with 0.075 mM AlCl<sub>3</sub>·6H<sub>2</sub>O. Species marked in different colors represents different paths for humin formation: etherification-dehydration-condensation (orange, humins **I**); degradative (– FA) condensation (blue, humins **II**); degradative (– GA) condensation (green, humins **III**).

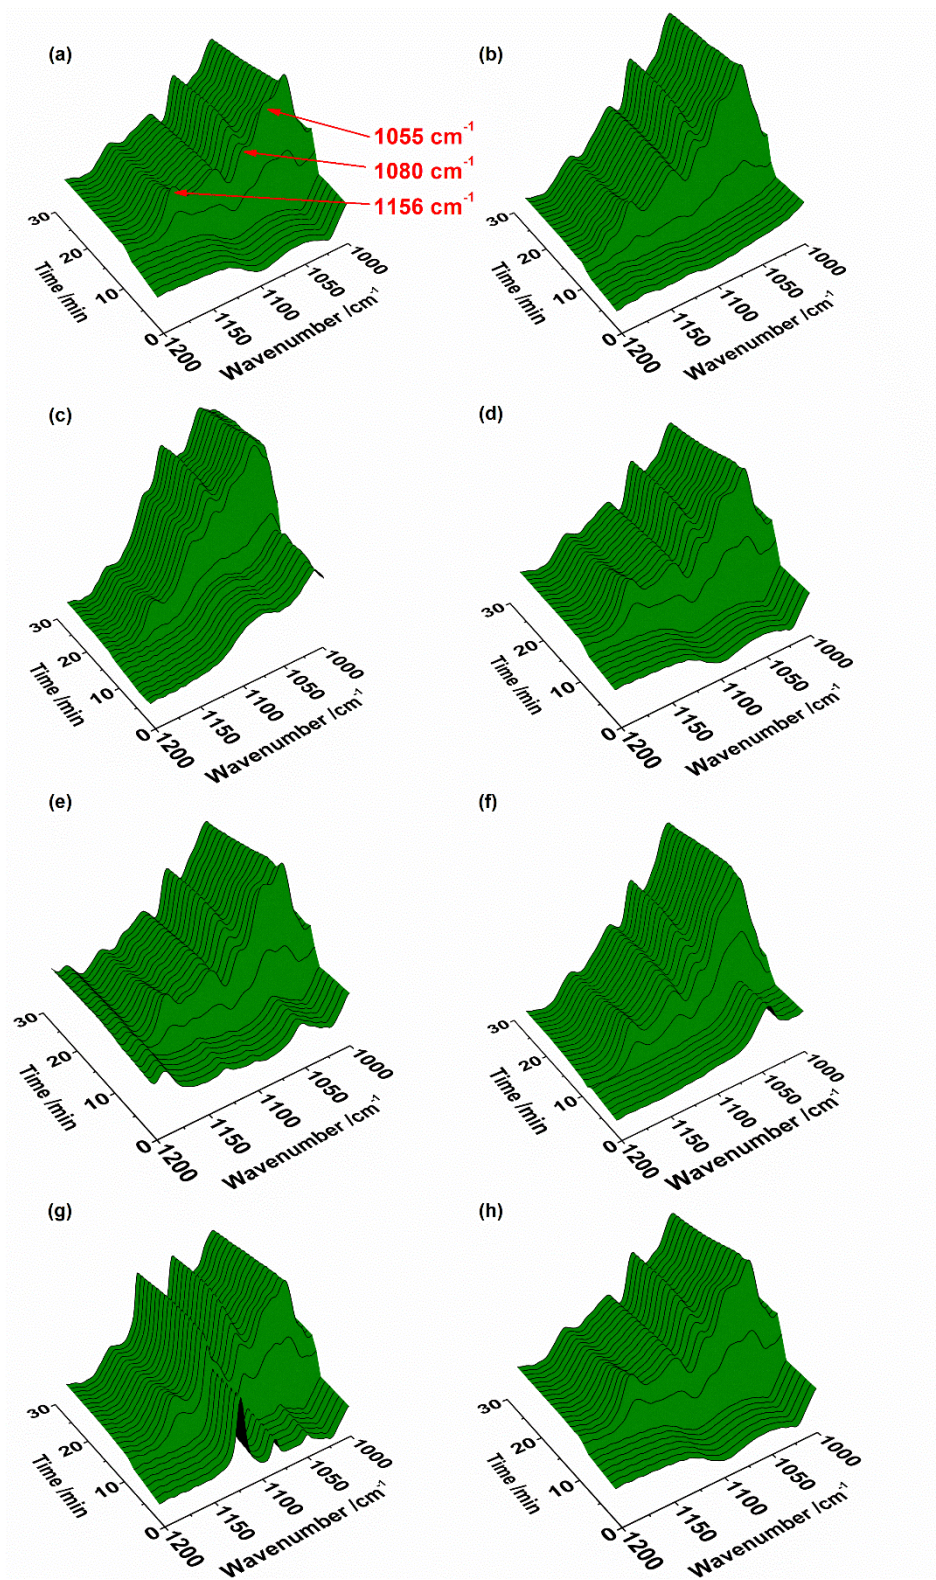

**Figure S3.** *In situ* ATR-IR spectra of the reaction mixture containing glucose in various solvents. (a)  $\text{H}_2\text{O}$ , (b) MIBK- $\text{H}_2\text{O}$ , (c) MTHF- $\text{H}_2\text{O}$ , (d) DMF- $\text{H}_2\text{O}$ , (e) GVL- $\text{H}_2\text{O}$ , (f) THF- $\text{H}_2\text{O}$ , (g) DIO- $\text{H}_2\text{O}$ , and (h) NMP- $\text{H}_2\text{O}$ . The FT-IR peaks at  $1055 \text{ cm}^{-1}$  and  $1080 \text{ cm}^{-1}$  are selected as the characteristic peaks of  $\alpha$ -D-glucopyranose and  $\beta$ -D-glucopyranose, respectively; and IR peak at  $1156 \text{ cm}^{-1}$  represents the vibration of pyranose ring. Reaction conditions: 10 g of glucose, 50 mL of solvents,  $70 \text{ }^\circ\text{C}$ .

**Table S1.** Physical properties and Kamlet-Taft parameters of the polar aprotic organic solvents.

| Entry | Solvents | Boiling point (°C) | Solubility in water | Density<br>g/mL | $V_{\text{H}_2\text{O}}/V_{\text{org}}$ | Kamlet-Taft parameters |         |       |
|-------|----------|--------------------|---------------------|-----------------|-----------------------------------------|------------------------|---------|-------|
|       |          |                    |                     |                 |                                         | $\alpha$               | $\beta$ | $\pi$ |
| 1     | MIBK     | 115.8              | 1.7 g/100 mL        | 0.801           | 49/1                                    | 0                      | 0.48    | 0.65  |
| 2     | MTHF     | 78-80              | 15.0 g/100 mL       | 0.860           | 85/15                                   | 0                      | 0.45    | 0.53  |
| 3     | DMF      | 92-94              | 0.26 g/100 mL       | 0.905           | 399/1                                   | 0                      | -       | -     |
| 4     | GVL      | 207-208            | miscible            | 1.050           | -                                       | 0                      | 0.60    | 0.83  |
| 5     | DIO      | 101.3              | miscible            | 1.034           | -                                       | 0                      | 0.37    | 0.55  |
| 6     | THF      | 66                 | miscible            | 0.887           | -                                       | 0                      | 0.55    | 0.58  |
| 7     | NMP      | 203                | miscible            | 1.028           | -                                       | 0                      | 0.75    | 0.90  |

**Table S2.** Conversion of glucose in mixed solvents with  $V_{\text{H}_2\text{O}}/V_{\text{org}}$  of 90/10.

| Entry | $V_{\text{H}_2\text{O}}/V_{\text{org}}$ | Solvent              | Conv. of gluc. /% | Yield / % |     |     | Selectivity of FA /% |
|-------|-----------------------------------------|----------------------|-------------------|-----------|-----|-----|----------------------|
|       |                                         |                      |                   | Fruc.     | HMF | FA  |                      |
| 1     | 90/10                                   | GVL+H <sub>2</sub> O | 3.0               | 0.2       | -   | 1.0 | 33.3                 |
| 2     |                                         | THF+H <sub>2</sub> O | 6.0               | 3.1       | -   | 1.7 | 28.3                 |
| 3     |                                         | DIO+H <sub>2</sub> O | 3.5               | 1.2       | -   | 1.5 | 42.8                 |
| 4     |                                         | NMP+H <sub>2</sub> O | 6.7               | 1.4       | -   | 2.5 | 37.3                 |

Reaction conditions: 4.5 wt.% Glucose, 1 mL solvent, 120 °C, 4 h.

**Table S3.** The structural formula of the ionic species deconvoluted from the ESI-MS spectra of the reaction mixture after reacting glucose in various solvents at 120 °C for 4 h.

| m/z | Possible structural formula                     | m/z | Possible structural formula                 |
|-----|-------------------------------------------------|-----|---------------------------------------------|
| 209 | [3Glu-2FA-3H <sub>2</sub> O+H+Na] <sup>2+</sup> | 300 | [2Glu-GA-e] <sup>+</sup>                    |
| 235 | [2Glu-2FA-4H <sub>2</sub> O+K] <sup>+</sup>     | 301 | [2Glu-FA-2H <sub>2</sub> O+Na] <sup>+</sup> |
| 239 | [3Glu-6H <sub>2</sub> O+2Na] <sup>2+</sup>      | 305 | [2Glu-GA-H <sub>2</sub> O+Na] <sup>+</sup>  |
| 243 | [2Glu-FA-4H <sub>2</sub> O+H] <sup>+</sup>      | 309 | [2Glu-5H <sub>2</sub> O+K] <sup>+</sup>     |
| 249 | [2Glu-GA-5H <sub>2</sub> O+K] <sup>+</sup>      | 311 | [2Glu-4H <sub>2</sub> O+Na] <sup>+</sup>    |
| 250 | [3Glu-2FA-11H <sub>2</sub> O-e] <sup>+</sup>    | 321 | [2Glu-GA-H <sub>2</sub> O+K] <sup>+</sup>   |
| 251 | [3Glu-FA-3H <sub>2</sub> O+Na+K] <sup>2+</sup>  | 325 | [2Glu-2H <sub>2</sub> O+H] <sup>+</sup>     |
| 261 | [3Glu-FA-H <sub>2</sub> O+2Na] <sup>2+</sup>    | 329 | [2Glu-3H <sub>2</sub> O+Na] <sup>+</sup>    |
| 263 | [3Glu-2FA+2K] <sup>2+</sup>                     | 339 | [2Glu-GA+K] <sup>+</sup>                    |
| 272 | [3Glu-2H <sub>2</sub> O+H+K] <sup>2+</sup>      | 340 | [3Glu-2FA-6H <sub>2</sub> O-e] <sup>+</sup> |
| 281 | [3Glu-H <sub>2</sub> O+H+K] <sup>2+</sup>       | 347 | [2Glu-2H <sub>2</sub> O+Na] <sup>+</sup>    |
| 289 | [2Glu-2FA-H <sub>2</sub> O+K] <sup>+</sup>      | 353 | [2Glu-FA+K] <sup>+</sup>                    |
| 293 | [2Glu-5H <sub>2</sub> O+Na] <sup>+</sup>        | 365 | [2Glu-H <sub>2</sub> O+Na] <sup>+</sup>     |
| 294 | [3Glu-2GA-7H <sub>2</sub> O-e] <sup>+</sup>     | 377 | [3Glu-2FA-4H <sub>2</sub> O+H] <sup>+</sup> |
| 298 | [4Glu-4FA-H <sub>2</sub> O+2K] <sup>2+</sup>    | 381 | [2Glu-H <sub>2</sub> O+K] <sup>+</sup>      |
| 299 | [4Glu-2FA-3H <sub>2</sub> O+H+Na] <sup>2+</sup> | 415 | [3Glu-7H <sub>2</sub> O+H] <sup>+</sup>     |

**Table S4.** Conversion of glycolaldehyde dimer in various solvents.

| Entry | Solvent               | Yield of FA<br>/% |
|-------|-----------------------|-------------------|
| 1     | H <sub>2</sub> O      | 38.0              |
| 2     | MIBK+H <sub>2</sub> O | 36.7              |
| 3     | MTHF+H <sub>2</sub> O | 42.6              |
| 4     | DMF+H <sub>2</sub> O  | 24.0              |
| 5     | GVL+H <sub>2</sub> O  | 32.0              |
| 6     | THF+H <sub>2</sub> O  | 32.9              |
| 7     | DIO+H <sub>2</sub> O  | 41.8              |
| 8     | NMP+H <sub>2</sub> O  | 28.4              |

Reaction conditions: 0.25 mmol glycolaldehyde dimer, 1 mL solvent, 120 °C, 4 h.



**Table S5.** The protophilic energy ( $\Delta G$ ) of different solvents.

| Entry | Solvent          | $\Delta G$<br>/KJ·mol <sup>-1</sup> |
|-------|------------------|-------------------------------------|
| 1     | H <sub>2</sub> O | 217.1                               |
| 2     | MIBK             | -13.0                               |
| 3     | MTHF             | -24.1                               |
| 4     | DMF              | 62.3                                |
| 5     | GVL              | -9.8                                |
| 6     | THF              | -22.4                               |
| 7     | DIO              | -4.6                                |
| 8     | NMP              | -34.3                               |
